# Supplementary material
Source: Springer Nature journal article supplement (https://www.springermedizin.de/resource/supplementary/12936_2005_137_MOESM3_ESM.pdf/9546954)
Supplement: MOESM3 [file 9546954]

Volunteer 1  
Day 8 vs. 10

Volunteer 2  
Day 8 vs. 9

Volunteer 4  
Day 8 vs. 9

Volunteer 6  
Day 8 vs. 10

Volunteer 10  
Day 8 vs. 9

Gr A

Gr B/A

Gr B

Gr B/C

Gr C

var 1  
var 2

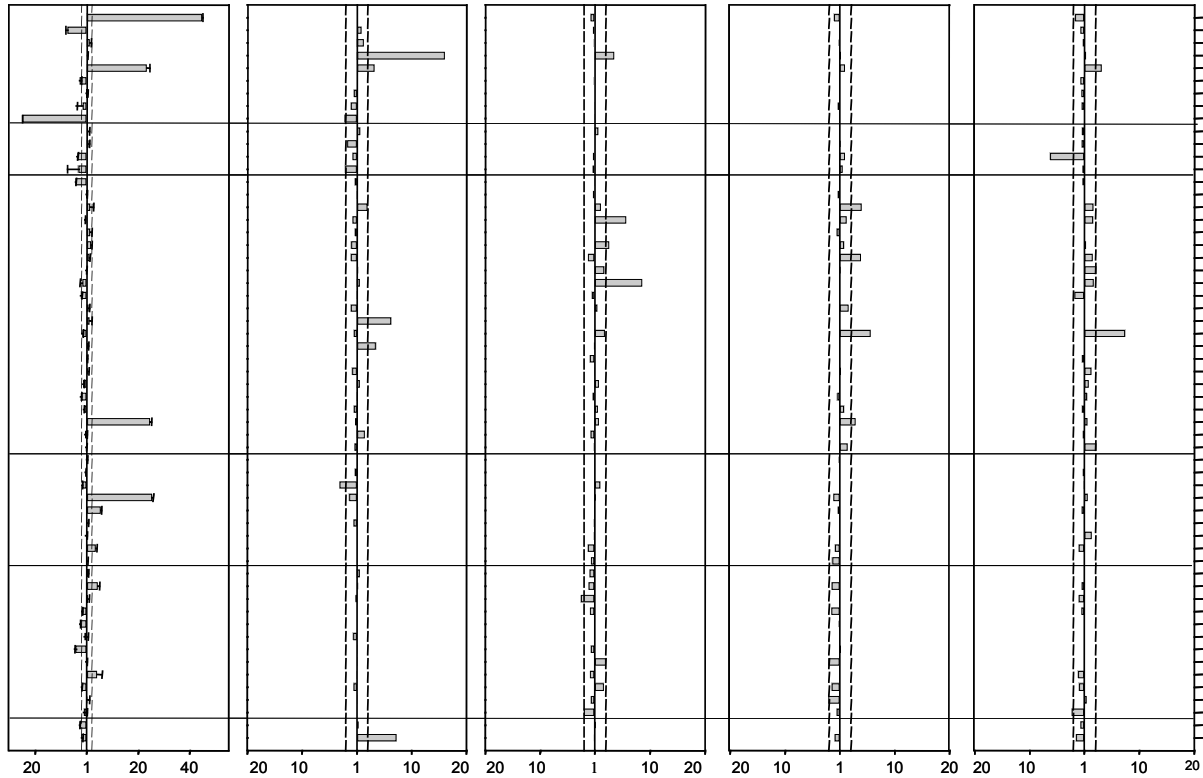

- PF11\_0008
- PF11\_0521
- PF13\_0003
- PFD0020c
- PFD1235w
- PF08\_0141
- MAL6P1.314
- PFI1820w
- PFA0015c
- PFL0020w
- PF08\_0140
- MAL6P1.4
- MAL6P1.316
- PFA0005w
- PF10\_0001
- PF10\_0406
- PF11\_0007
- PFL0935c
- PFL2665c
- PFL0005w
- PF13\_0364
- PFB1055c
- PFB0010w
- PFC1120c
- PFC0005w
- PFD0005w
- PFD1245c
- PFE0005w
- PF08\_0142
- PF07\_0139
- PFI1830c
- PF13\_0001
- MAL6P1.1
- PFI0005w
- PFA0765c
- PFL1955w
- PFD1005c
- PF07\_0050
- MAL7P1.55
- PF08\_0106
- PF08\_0103
- MAL7P1.50
- PFL1950w
- PFL1960w
- PFD0615c
- PFD0625c
- PFD1000c
- PFD1015c
- MAL6P1.252
- PF07\_0048
- PF07\_0049
- MAL7P1.56
- PF07\_0051
- PF08\_0107
- PFD095c
- PFE1640w
- PFL0030c
